# Supplementary material for: Methyl-restricted rotor rotation on the stator produces high-efficiency fluorescence emission: a new strategy to achieve aggregation-induced emission
Source: Royal Society of Chemistry journal article supplement (doi:10.1039/c9ra01636h), 2019-01-01

*Electronic Supplementary Information (ESI) for*

**Methyl-restricted fluorescent rotor rotation on the stator produces  
high-efficiency fluorescence emission: A new strategy to achieve  
aggregation-induced emission**

Haicheng Yang,<sup>a</sup> Xinyue Zhou,<sup>a</sup> Tianqi Hui,<sup>a</sup> Yingying Han,<sup>a</sup> Xiaonan Jiang,<sup>a</sup>  
and Jie Yan<sup>\*a</sup>

<sup>a</sup> *College of Chemistry and Chemical Engineering, Liaoning Normal University,  
Huanghe Road 850#, Dalian City, 116029, PR China. E-mail: yhc1994@live.cn*

**Table of Contents**

|                                                                                 |    |
|---------------------------------------------------------------------------------|----|
| Fig. S1. XRD diffractogram of as-prepared powder of TFTB and TFB.               | S2 |
| Fig. S2. PL spectra of TFB in water/THF mixtures with different water fraction. | S2 |
| Fig. S3. Molecular orbital amplitude plots of HOMO and LUMO of TFTB and TFB.    | S3 |
| Fig. S4. Absorption spectra of TFTB and TFB in THF solutions.                   | S3 |
| Fig. S5. Calculated HOMO and LUMO energy levels of TFTB and TFB.                | S4 |
| Fig. S6. DSC curves (second heating scan) of TFTB and TFB.                      | S4 |
| Characterization                                                                | S5 |

## Figures

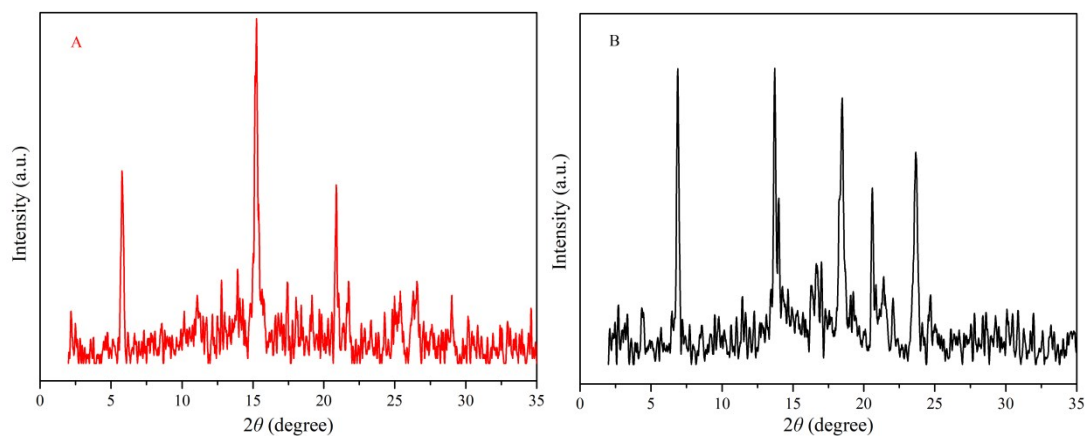

Fig. S1. XRD diffractogram of as-prepared powder of (A) TFTB and (B) TFB.

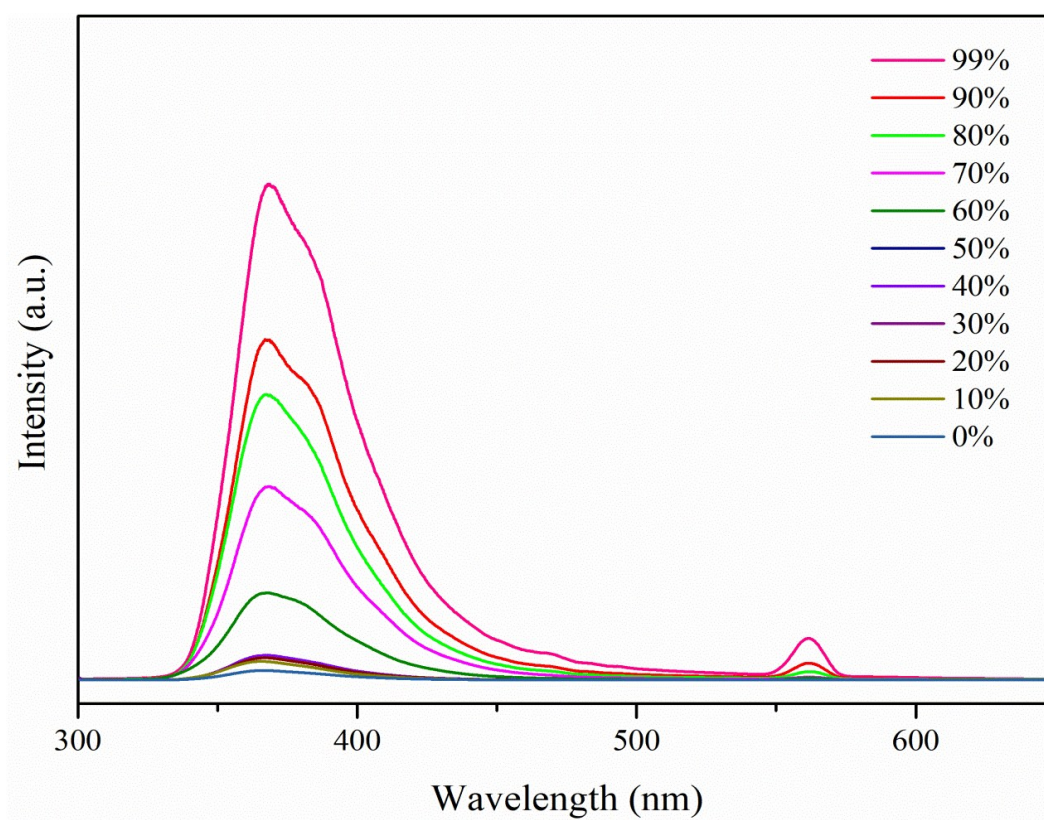

Fig. S2. PL spectra of TFB in THF/water mixtures with different water fraction ( $f_w$ ).

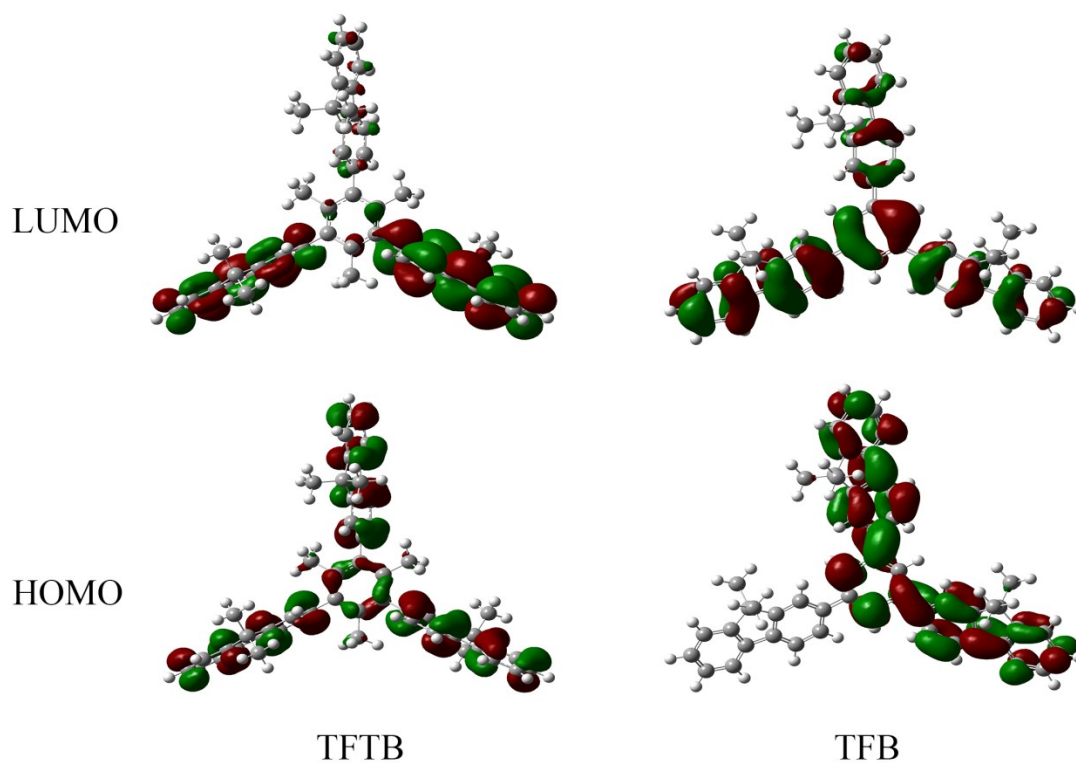

Fig. S3. Molecular orbital amplitude plots of HOMO and LUMO of TFTB and TFB calculated using B3LYP/6-31G(d) basis set.

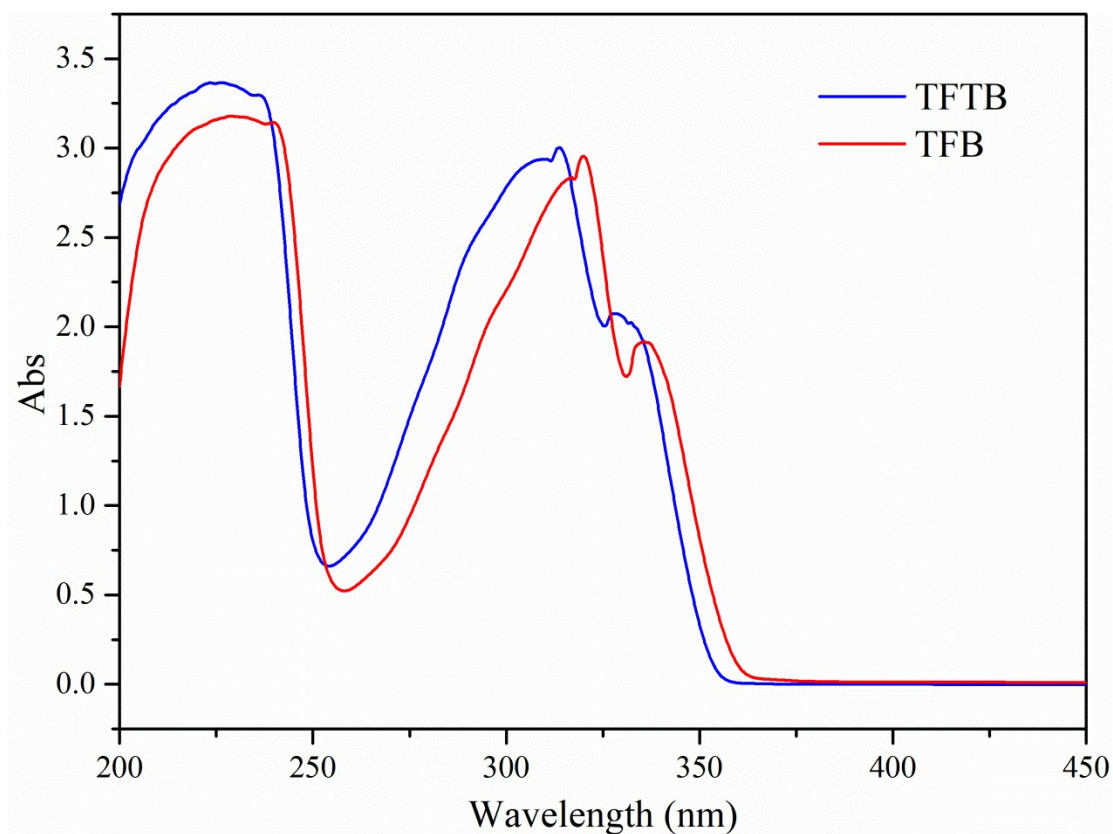

Fig. S4. Absorption spectra of TFTB and TFB in THF solutions.

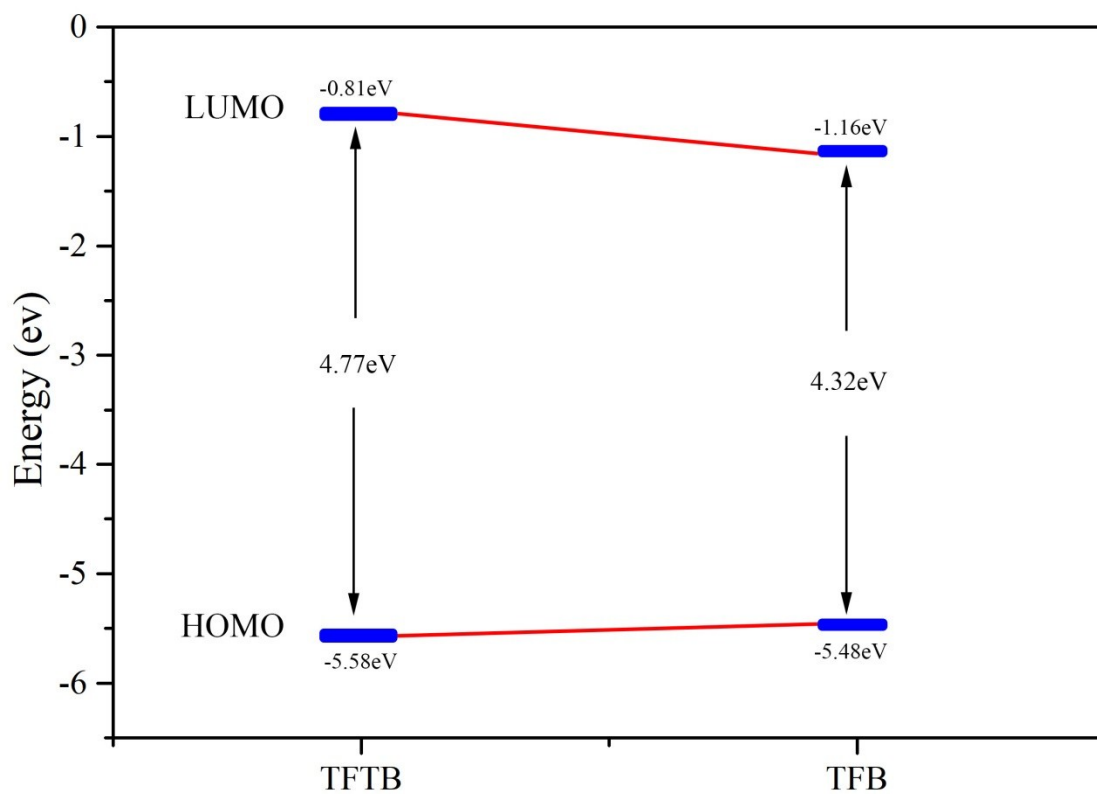

Fig. S5. Calculated HOMO and LUMO energy levels of TFTB and TFB using B3LYP/6-31G(d) basis set.

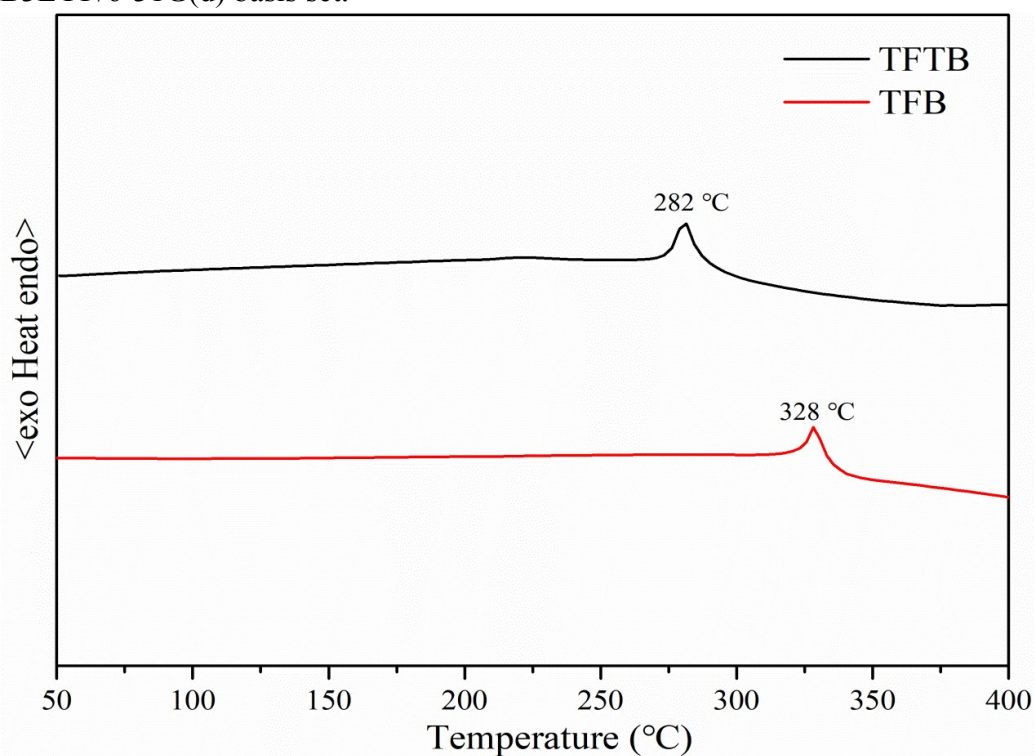

Fig. S6. DSC curves (second heating scan) of TFTB and TFB recorded under nitrogen  $10 \text{ mL min}^{-1}$  at a heating rate of  $10 \text{ }^\circ\text{C min}^{-1}$ .

**<sup>1</sup>H spectrum of 1 in CDCl<sub>3</sub>.**

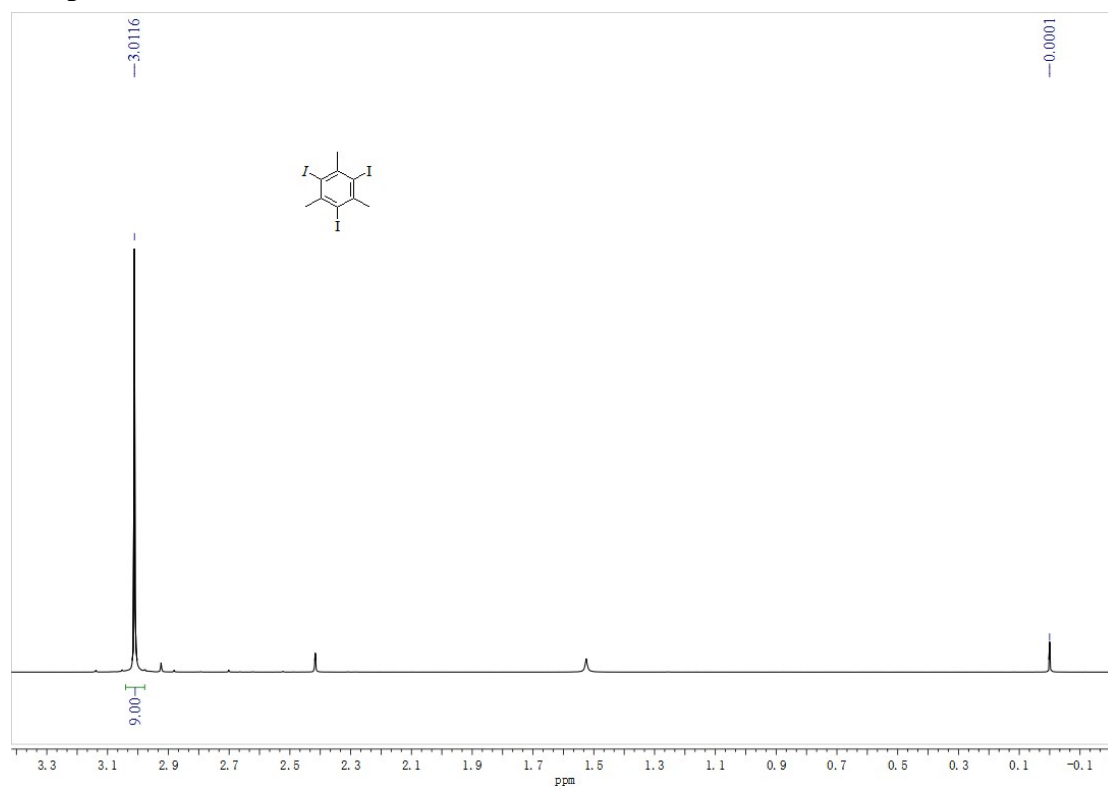

**<sup>13</sup>C spectrum of 1 in CDCl<sub>3</sub>.**

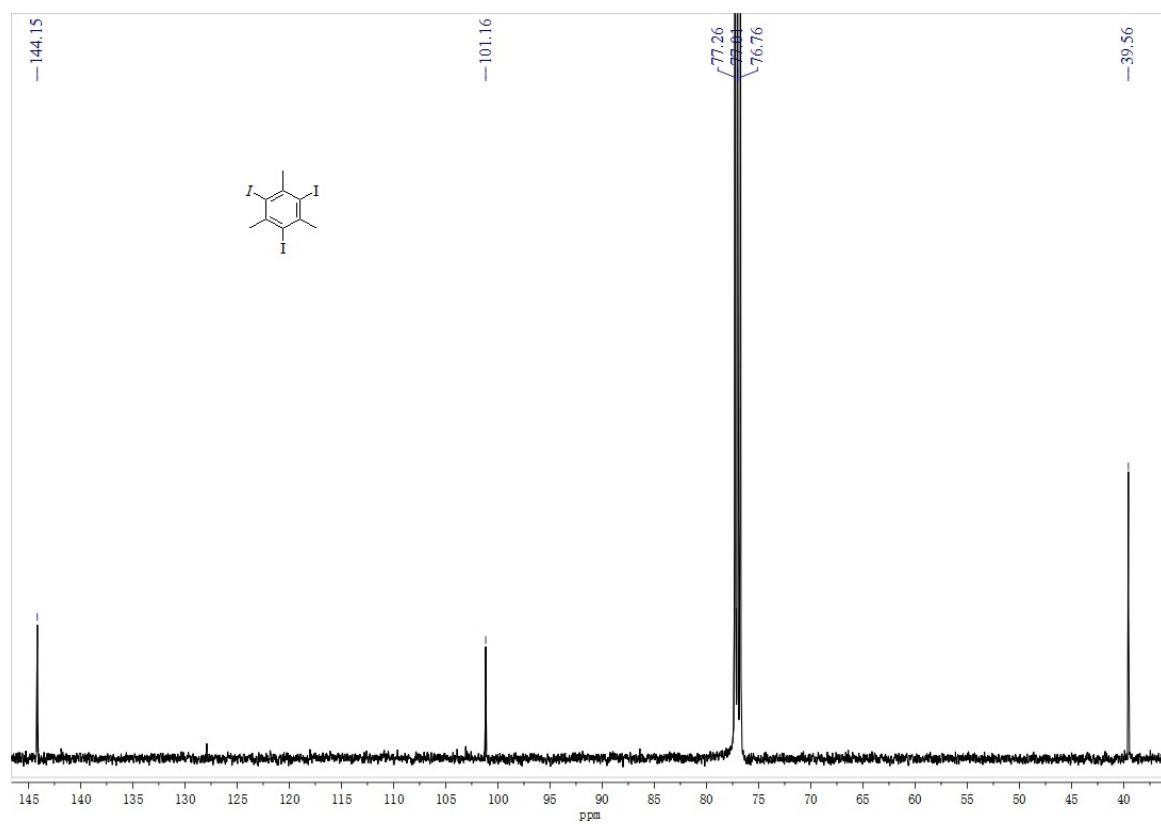

### <sup>1</sup>H spectrum of 2 in CDCl<sub>3</sub>.

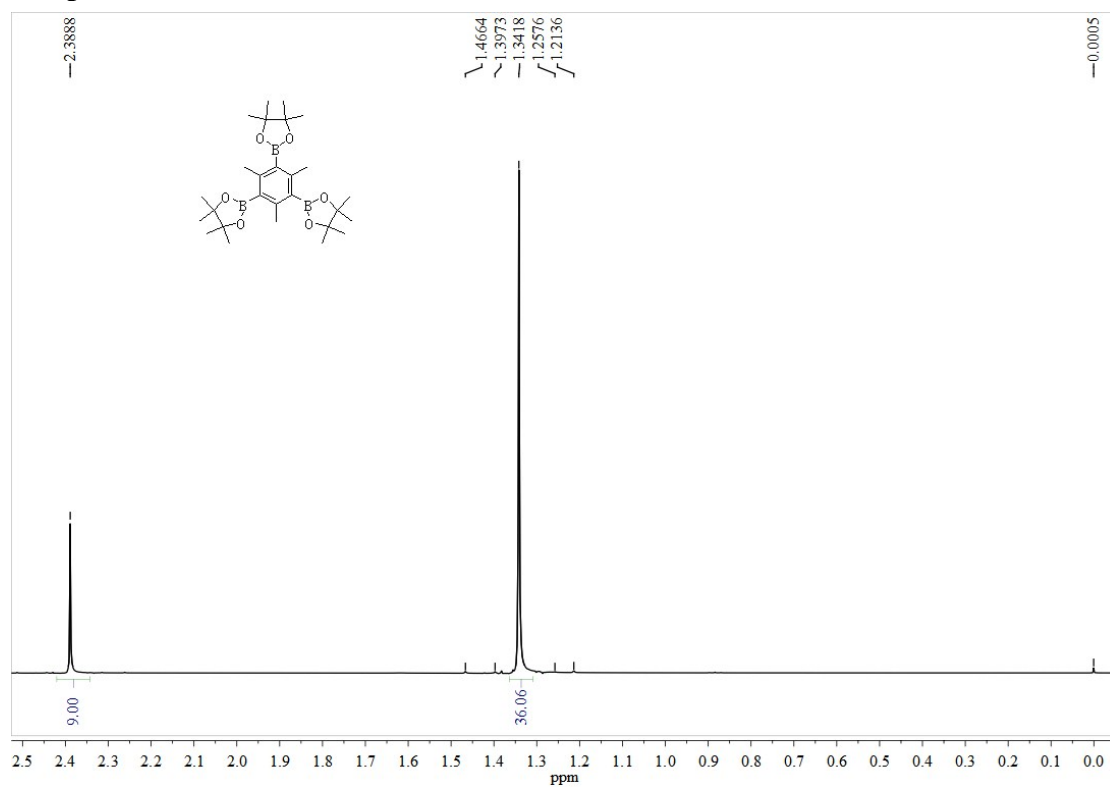

### <sup>13</sup>C spectrum of 2 in CDCl<sub>3</sub>.

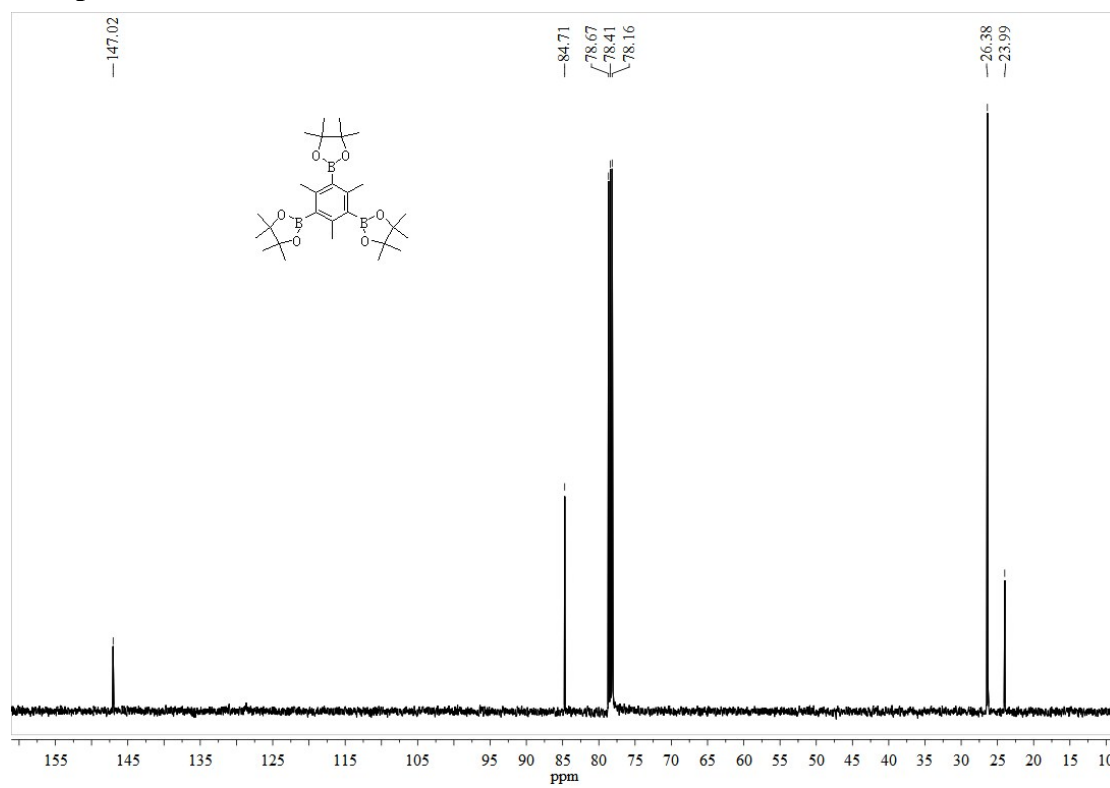

### <sup>1</sup>H spectrum of 3 in CDCl<sub>3</sub>.

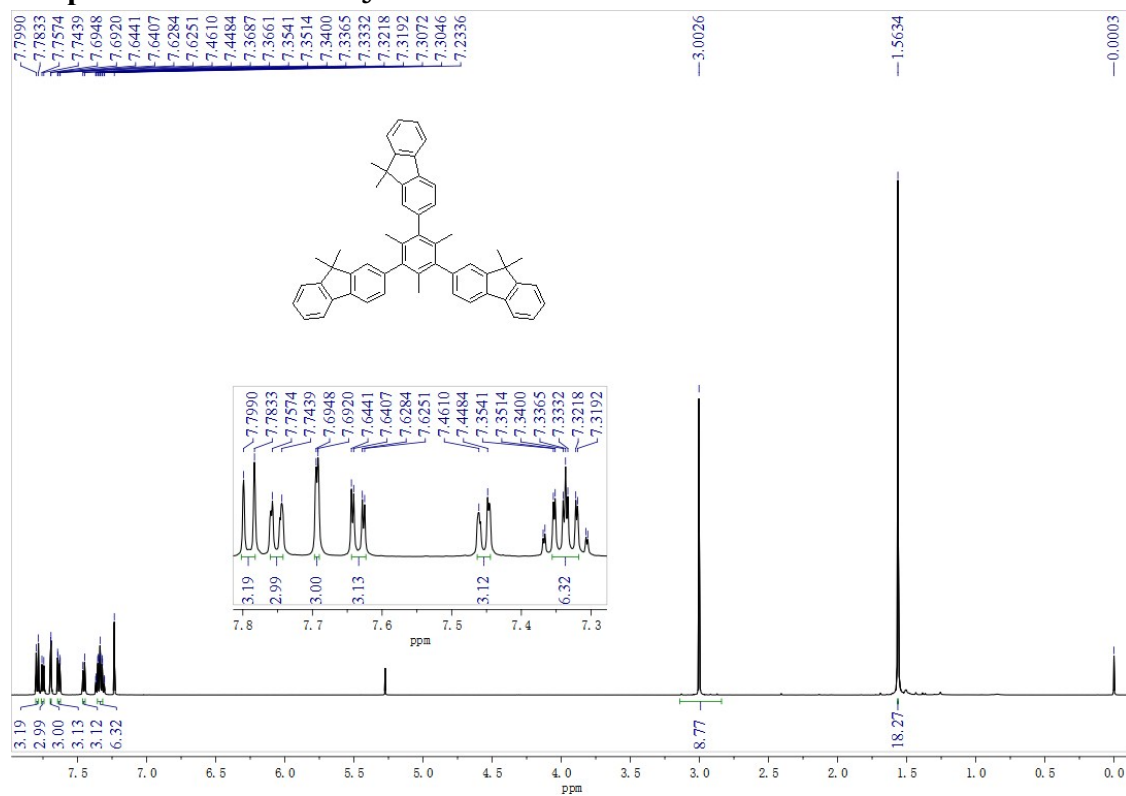

### <sup>13</sup>C spectrum of 3 in CDCl<sub>3</sub>.

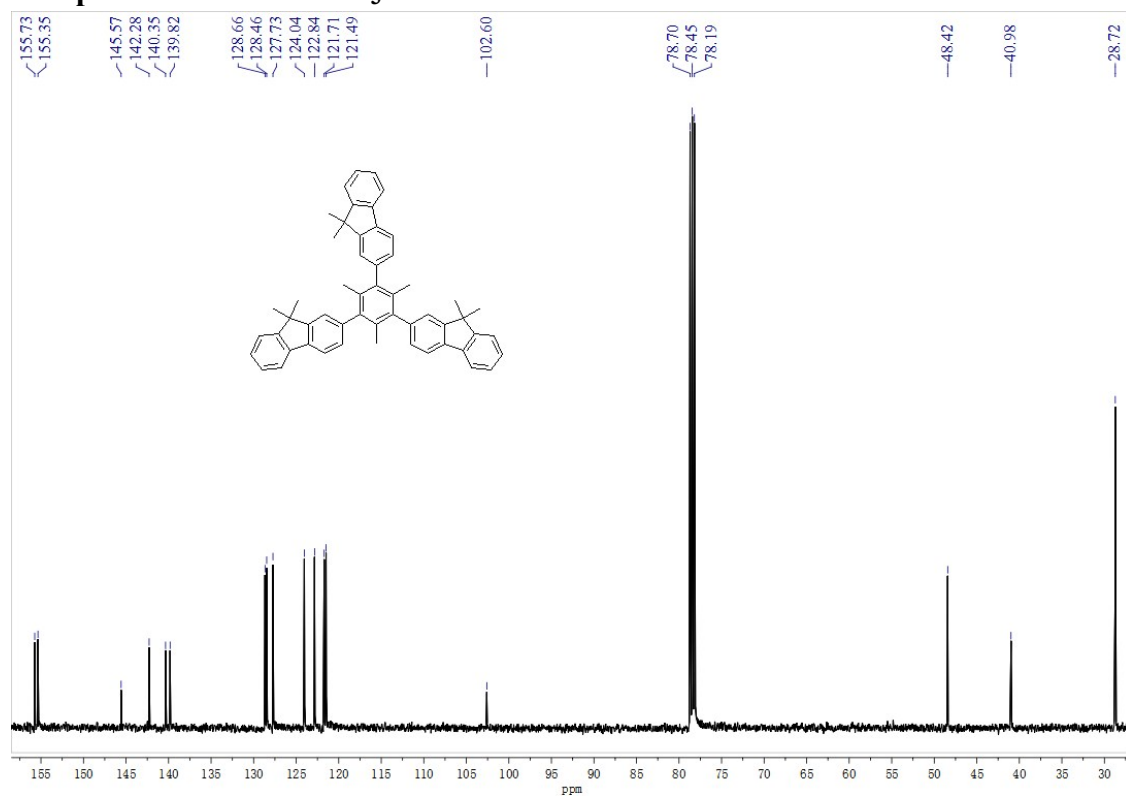

### <sup>1</sup>H spectrum of 4 in CDCl<sub>3</sub>.

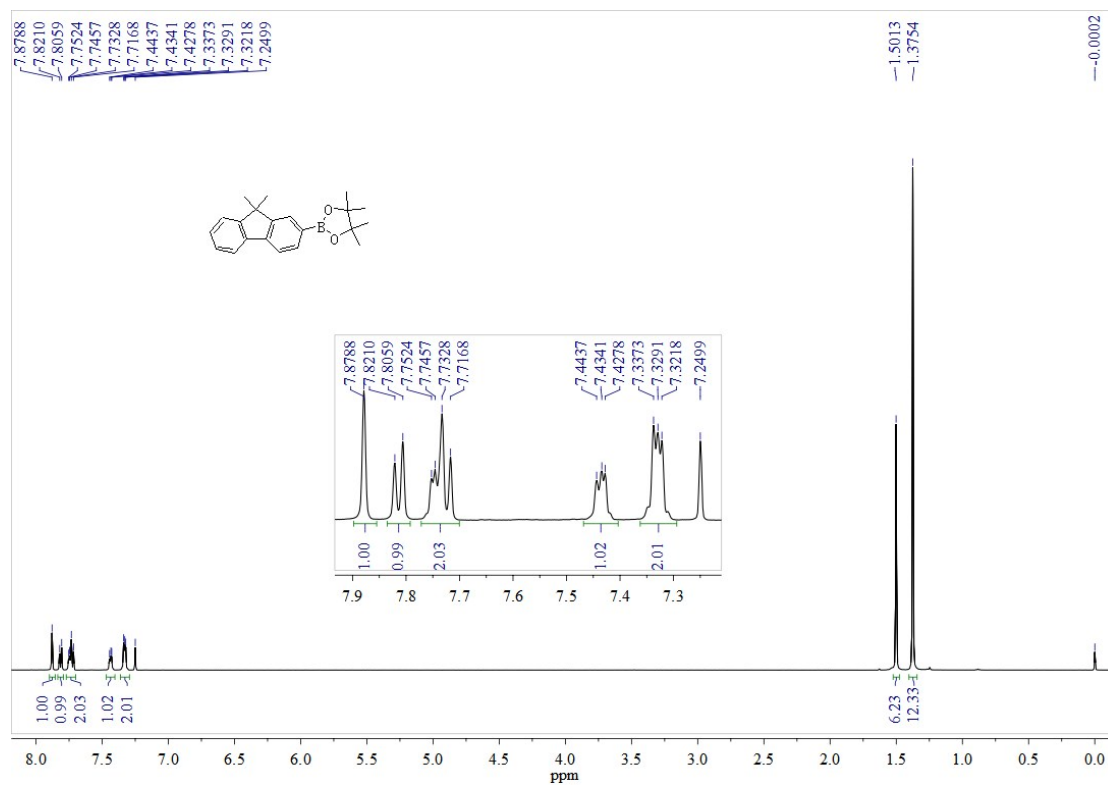

### <sup>13</sup>C spectrum of 4 in CDCl<sub>3</sub>.

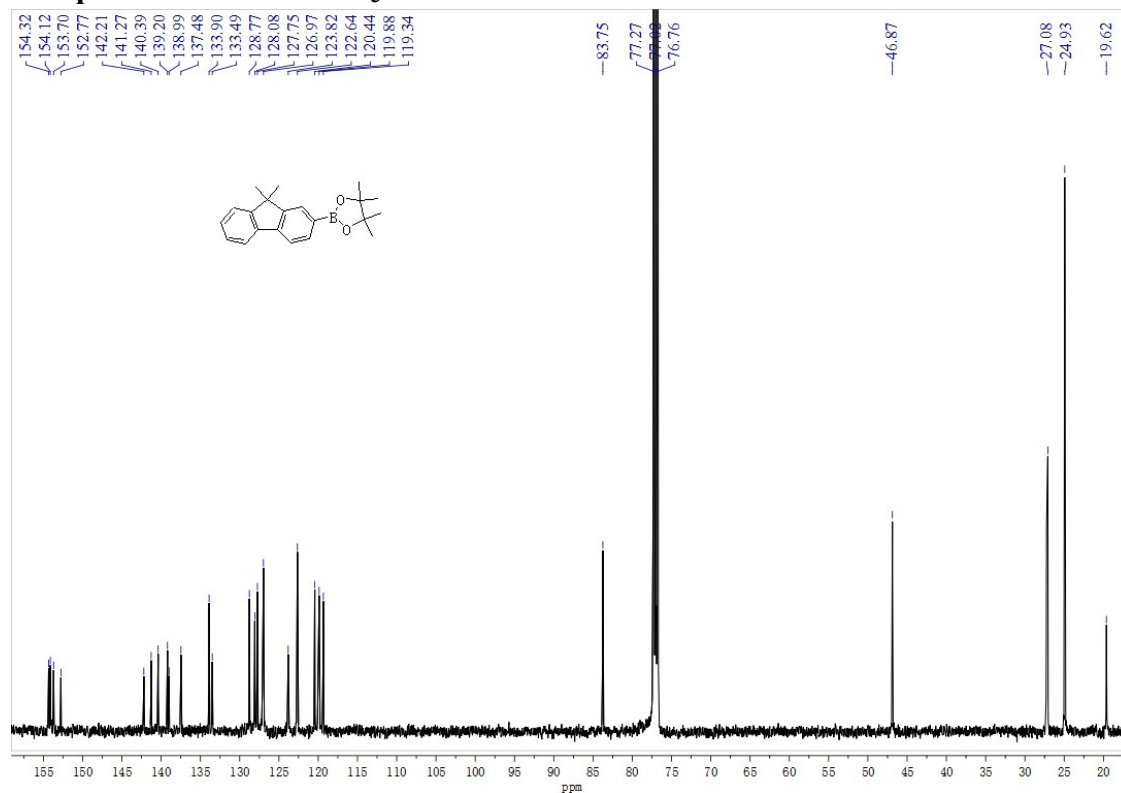

Supplement: c9ra01636h1.pdf [file c9ra01636h1.pdf]
